# Supplementary material for: Anti-Candida albicans Effects and Mechanisms of Theasaponin E1 and Assamsaponin A
Source: MDPI journal article supplement (doi:10.3390/ijms24119350), 2023-05-27
Supplement: s1 [file s1]

# Anti-*Candida albicans* Effects and Mechanisms of Theasaponin E1 and Assamsaponin A

## Supplementary Tables

**Supplementary Table S1.** Transcriptome data quality control.

| Sample    | Raw Read Number | Raw Bases  | Raw Q30 Number | Raw N Rate | Raw Q20 Rate | Raw Q30 Rate |
|-----------|-----------------|------------|----------------|------------|--------------|--------------|
| Control-1 | 41786928        | 6309826128 | 5850599592     | 0.000788   | 97.47        | 92.72        |
| Control-1 | 47489568        | 7170924768 | 6687522569     | 0.00093    | 97.71        | 93.25        |
| Control-3 | 38251358        | 5775955058 | 5404483320     | 0.000795   | 97.84        | 93.56        |
| TE1-1     | 38021816        | 5741294216 | 5317132883     | 0.000789   | 97.38        | 92.61        |
| TE1-2     | 39392002        | 5948192302 | 5550805261     | 0.000789   | 97.69        | 93.31        |
| TE1-3     | 45244014        | 6831846114 | 6338555973     | 0.000787   | 97.46        | 92.77        |
| ASA-1     | 43608994        | 6584958094 | 6118634651     | 0.000791   | 97.54        | 92.91        |
| ASA-2     | 39230128        | 5923749328 | 5504170948     | 0.000796   | 97.52        | 92.91        |
| ASA-3     | 44734742        | 6754946042 | 6266585664     | 0.000796   | 97.47        | 92.77        |

**Supplementary Table S2.** Statistics on the number of differentially expressed genes in different sectors.

| Comparison      | All  | Up   | Down |
|-----------------|------|------|------|
| Control vs. TE1 | 2135 | 1344 | 791  |
| Control vs. ASA | 2105 | 1339 | 766  |
| TE1 vs. ASA     | 17   | 15   | 2    |

The criteria for screening differences were DESeq2  $|\log_2\text{foldchang}| > 1$  and p-value  $< 0.05$ .

**Supplementary Table S3.** Primers for qRT-PCR.

| Primer     | Sequence                |
|------------|-------------------------|
| 18S rRNA-F | AATTACCCAATCCCGACAC     |
| 18S rRNA-R | TGCAACAACCTTTAATATACGC  |
| ERG1-F     | ACCGGCTGGTATCAAGGCATT   |
| ERG1-R     | GGCATCAGGAAGTGGCTTCAC   |
| ERG3-F     | TGCTTCTCATGCTTTCCATCCA  |
| ERG3-R     | GGACAGTGTGACAAGCGGTAC   |
| ERG11-F    | TGGAGACGTGATGCTGCTCAA   |
| ERG11-R    | GCAGAAGTATGTTGACCACCCA  |
| ERG24-F    | GGTGACTTAGCGTGGGTTCTT   |
| ERG24-R    | CACCAGCCTTCCACCAACAATT  |
| ERG26-F    | CAGCTTCACCGATGCATGGATT  |
| ERG26-R    | CCGCAGGACGTAAACAAACAGT  |
| ADH2-F     | CATTGGTTGGTGGTCACGAAGG  |
| ADH2-R     | TGAACAGCGTCAGCAGTAGCA   |
| ADH3-F     | GCTGCTGTTGCTACTGATTCTG  |
| ADH3-R     | CCAATTTCTCAACCGCACCTTT  |
| ALD5-F     | GCACAAGCCGCATACCACAA    |
| ALD5-R     | CCAACCACCACAGGATCTGAAG  |
| ALD6-F     | TGCTGATGCTCAAGGTGATGTT  |
| ALD6-R     | GCTCCAGGTACACGTTCACTTG  |
| ADH1-F     | GCTACTGCTGATGCTGTCCAAG  |
| ADH1-R     | TCGTCACCACCGTCAATAGCA   |
| CDC19-F    | ACCTACAACCCAAGACCAACCA  |
| CDC19-R    | AACAGCGGCAACAGCACAAAG   |
| CHO2-F     | GTCGGGTTTCGGATTCTCCTTCT |
| CHO2-R     | CCCATAACGCCACAACTCCAA   |
| GUT2-F     | TAGTGCTGCTGTTGGTGGTACA  |
| GUT2-R     | ACGAGATGGTGGTGGTGAAT    |
| ENA21-F    | TTCTGTGGTGCCGATGACGATA  |
| ENA21-R    | ACGAGCAAGTATCAGTGTGGC   |
| PHO88-F    | TGGTGTTCCAGCTTCTGGTGAT  |
| PHO88-R    | CGGCAGTTTCAGCACTTTCAAC  |
| CDR1-F     | ACGATCCAACACCAGGGAAACT  |
| CDR1-R     | TCTCGCAACACCATACCTCACT  |

## Supplementary Methods

The high-purity saponin mixture purified by macroporous resin enters the preparation liquid phase for further separation and purification.

### Preparation and isolation of differentiated samples from the tea saponin mixture

Differentiated samples purified via Waters Auto Purification system (2545 pump-PCM 510 Compensated pump-2767 sample manager-2489 DUV-2424 ELSD, Waters, Milford, Massachusetts, USA), fitted with a Waters Sunfire C18 column (5  $\mu$ m, 30  $\times$  250 mm, Waters, Milford, MA, USA). The injection volume was 1800  $\mu$ L, and the mobile phase flow rate was 30 mL/min. Solvent System A: Water contains 0.1% formic acid; B: CH<sub>3</sub>CN / CH<sub>3</sub>OH = 1 / 1 (containing 0.1% formic acid). The mobile phase elution gradient was 5% B at 0.01 min, ramped linearly to 40% B at 3 min, 70% B at 80 min, 95% B at 90 min, then back to 5% B at 100 min. This preparation procedure yields three main peaks (67.86 min of peak1, 71.37 min of peak2, and 76.25 min of peak3).

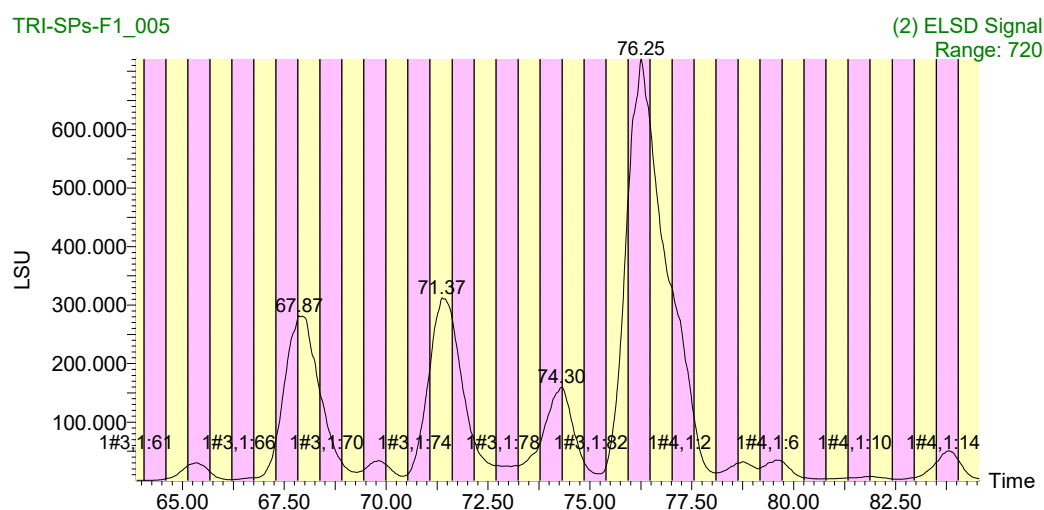

### Further purification

Further separate the substances of the three main peaks via YMC-ODS-A column (5  $\mu$ m, 30  $\times$  150 mm). The mobile phase elution gradient was 32% B at 0.01-3 min, ramped linearly to 43% B at 30 min, 95% B at 35 min, then back to 32% B at 40 min for isolating 2 substances from peak1.

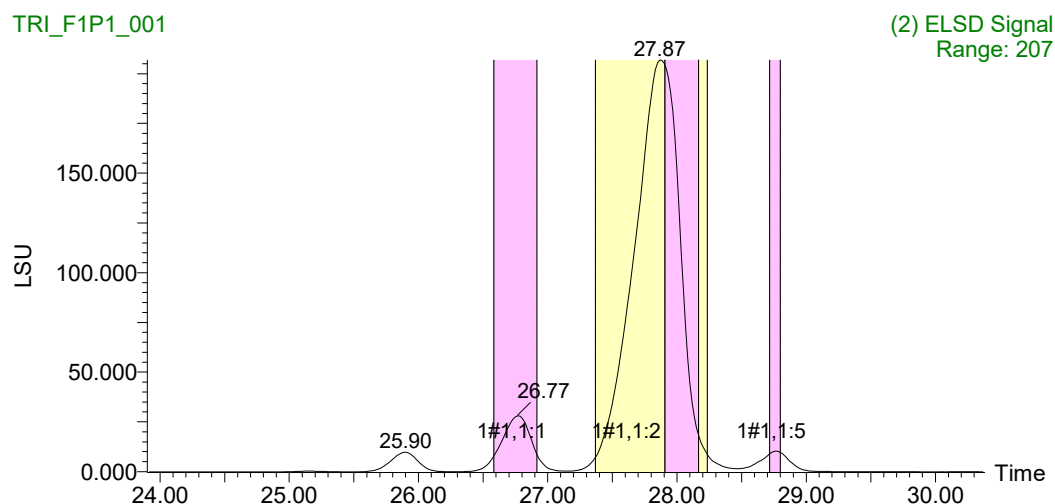

The mobile phase elution gradient was 31% B at 0.01-3 min, ramped linearly to 44% B at 30 min, 95% B at 35 min, then back to 31% B at 40 min for isolating 2 substances from peak2.

TRI\_F1-3P2\_001

(2) ELSD Signal  
Range: 153

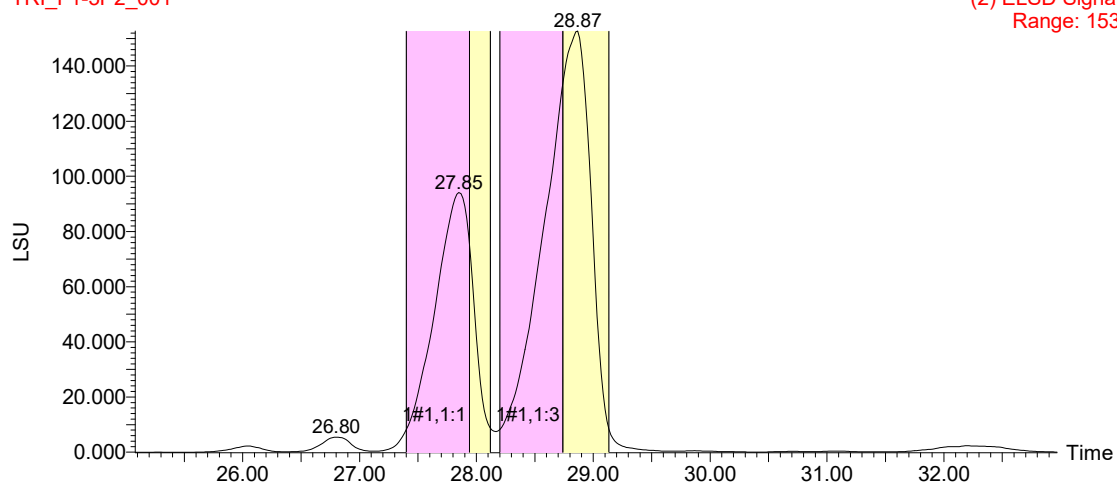

The mobile phase elution gradient was 32% B at 0.01-3 min, ramped linearly to 45% B at 30 min, 95% B at 35 min, then back to 32% B at 40 min for isolating 3 substances from peak3.

TRI-SPs-F1\_Peak3-01

(2) ELSD Signal  
Range: 400

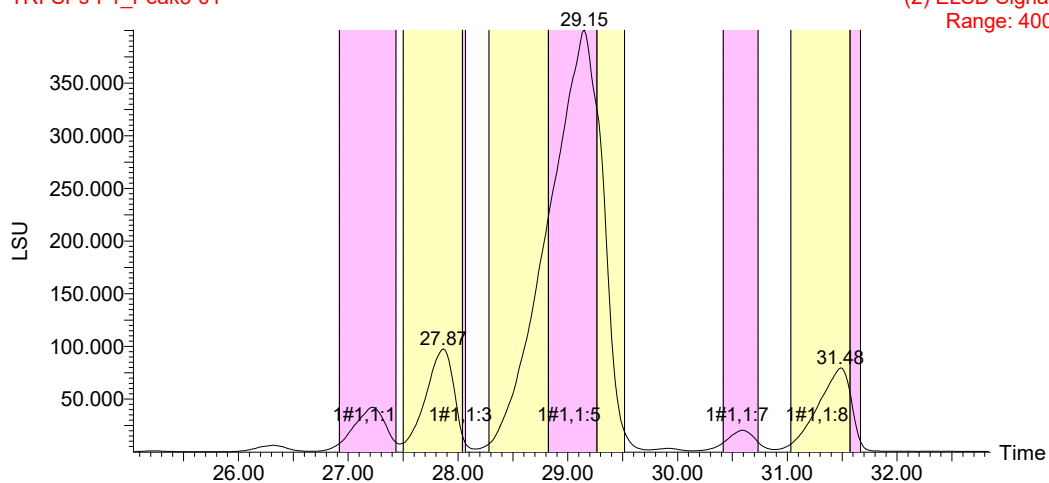

## Characterization data of Theasaponin E1 and Assamsaponin A

Product Name: **Theasaponin E1**, Exact Mass: 1230.5669

### CNMR

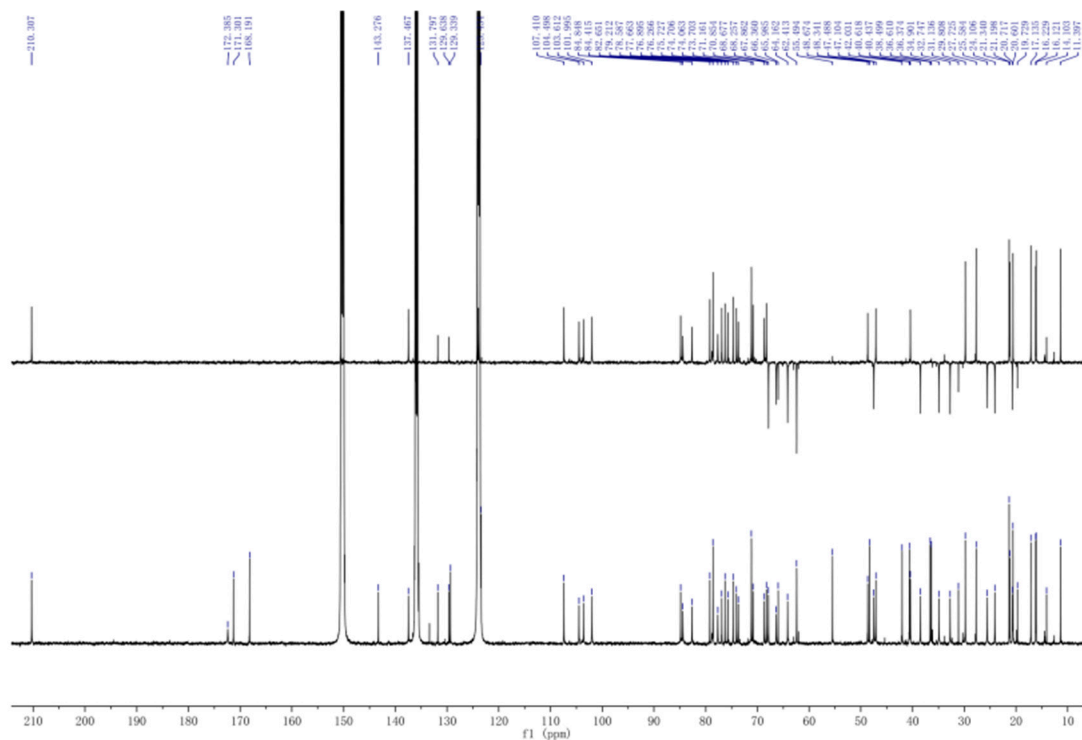

### HNMR

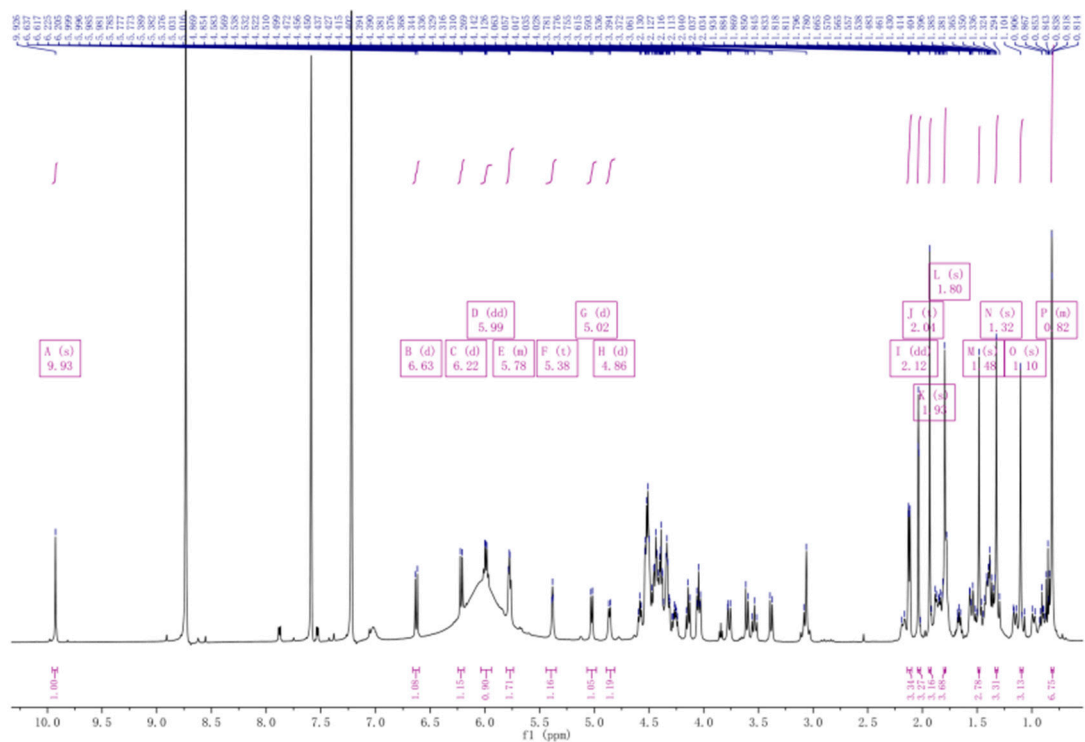

# LC-MS

20220803\_Neg\_S09 1283 (9.360)

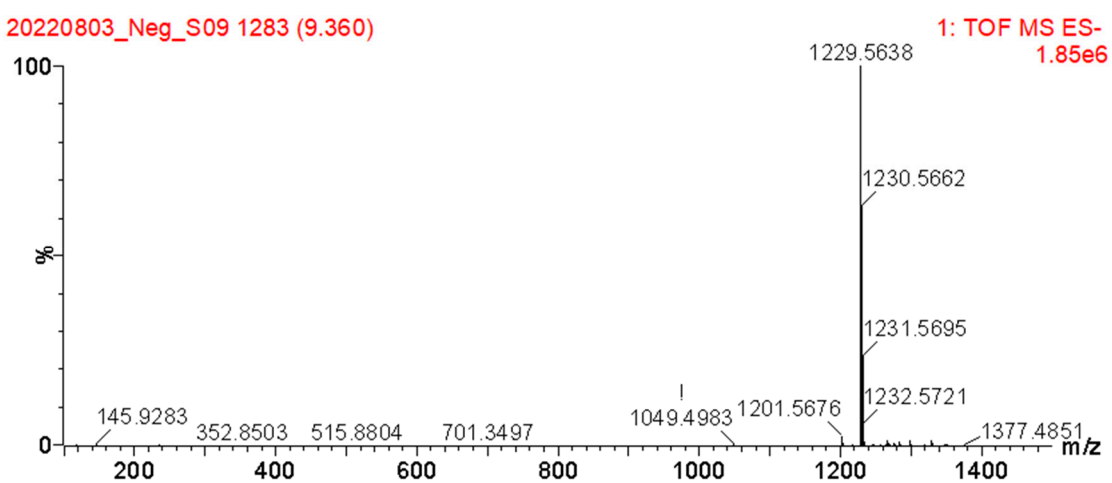

## Purity

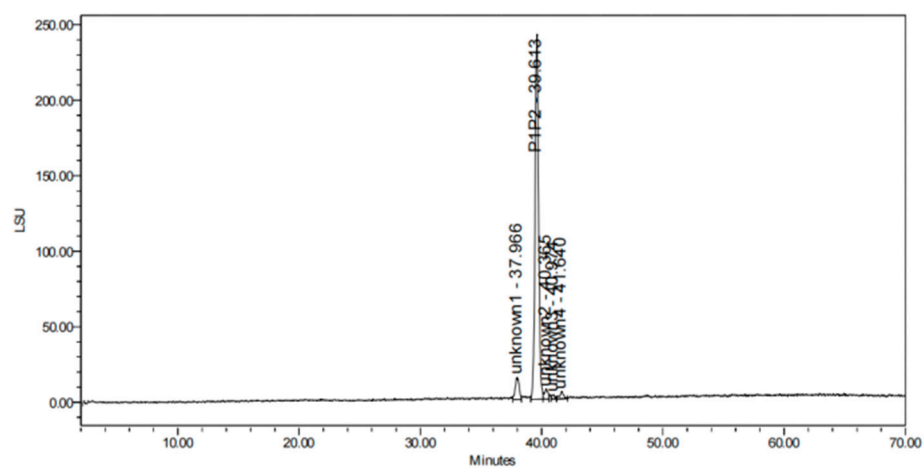

|   | Peak Name | RT     | Area    | % Area | Height |
|---|-----------|--------|---------|--------|--------|
| 1 | unknown1  | 37.966 | 325567  | 5.93   | 14512  |
| 2 | P1P2      | 39.613 | 4871574 | 88.66  | 241822 |
| 3 | unknown2  | 40.365 | 134027  | 2.44   | 6614   |
| 4 | unknown3  | 40.974 | 52993   | 0.96   | 2747   |
| 5 | unknown4  | 41.640 | 110426  | 2.01   | 4787   |

CNMR

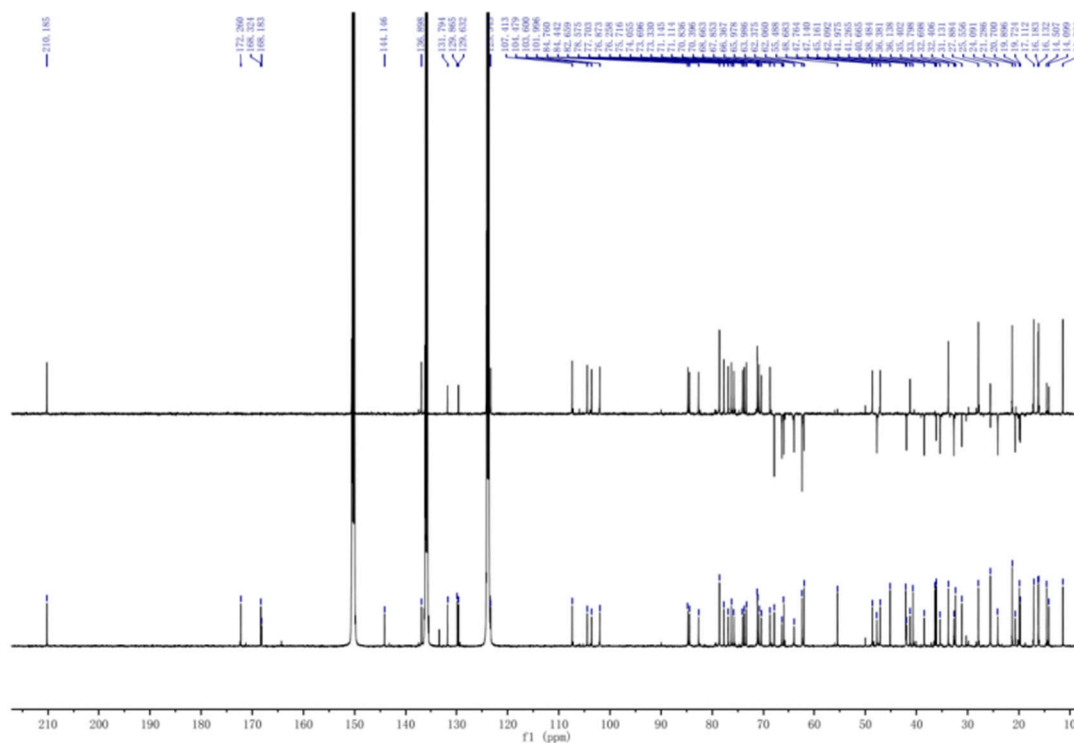

HNMR

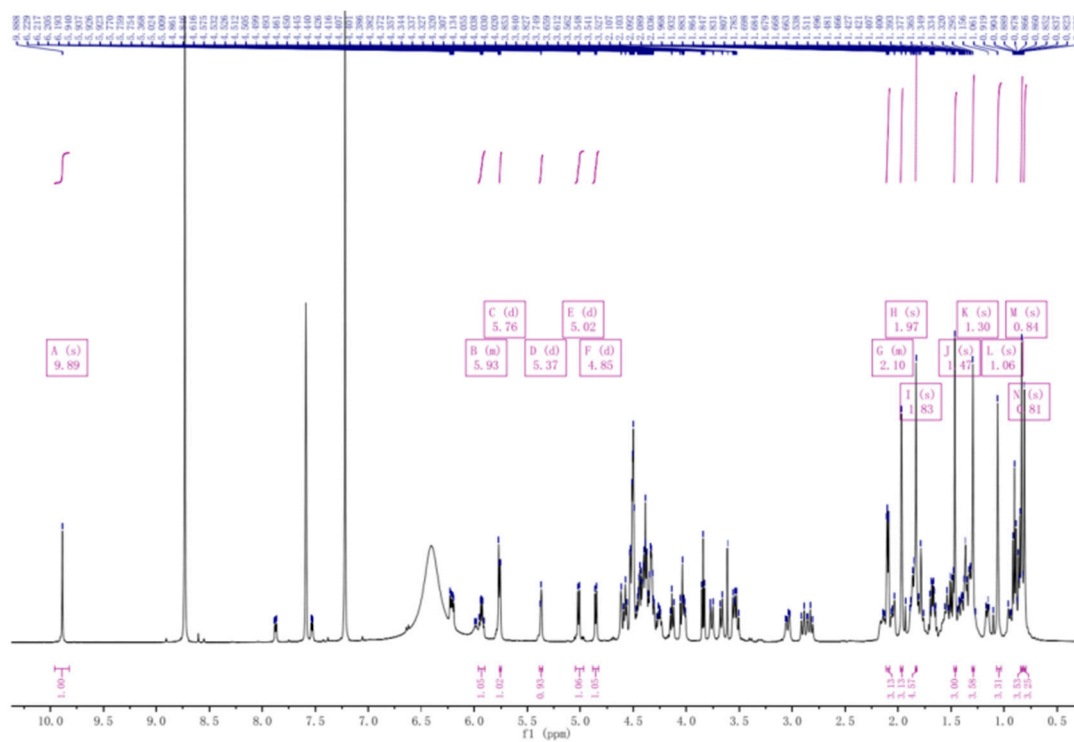

# LC-MS

20220803\_Neg\_S05 1609 (11.734)

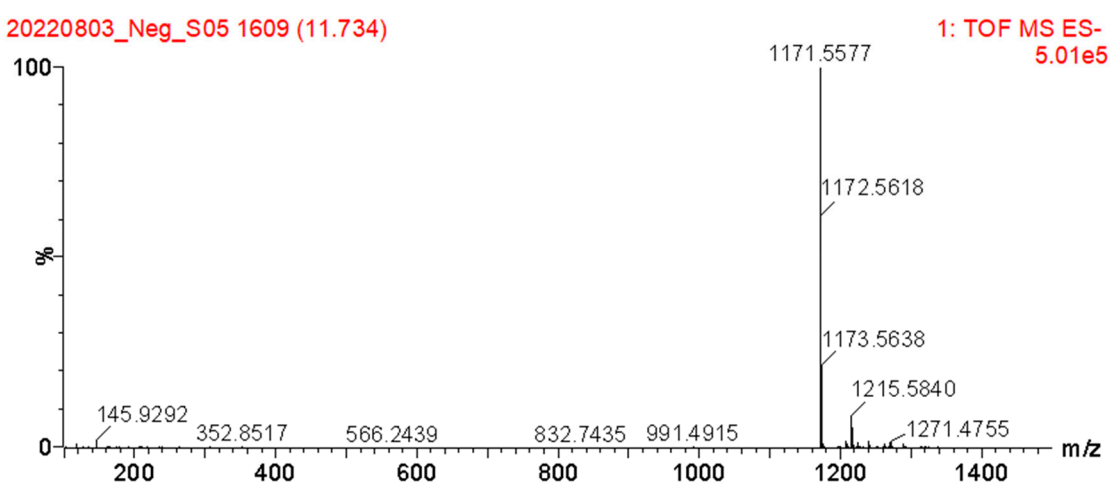

## Purity

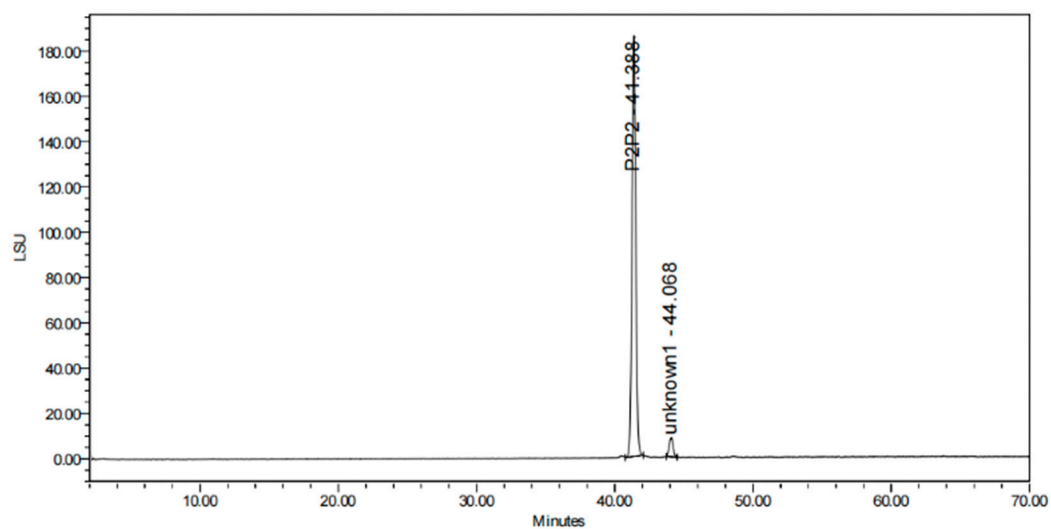

|   | Peak Name | RT     | Area    | % Area | Height |
|---|-----------|--------|---------|--------|--------|
| 1 | P2P2      | 41.388 | 3446659 | 95.40  | 185882 |
| 2 | unknown1  | 44.068 | 166375  | 4.60   | 8407   |
